# Supplementary material for: A STUB1 ubiquitin ligase/CHIC2 protein complex negatively regulates the IL-3, IL-5, and GM-CSF cytokine receptor common β chain (CSF2RB) protein stability
Source: PubMed Central journal article supplement (PMC9574515; doi:10.1016/j.jbc.2022.102484), 2022-09-13

**A.**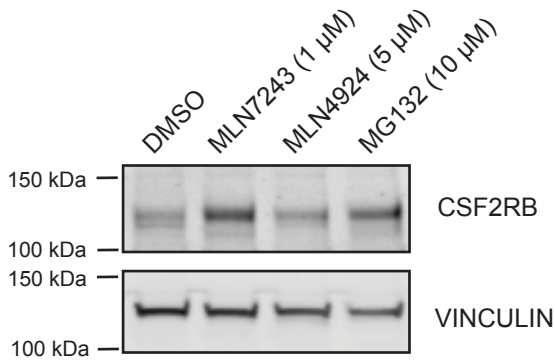**B.**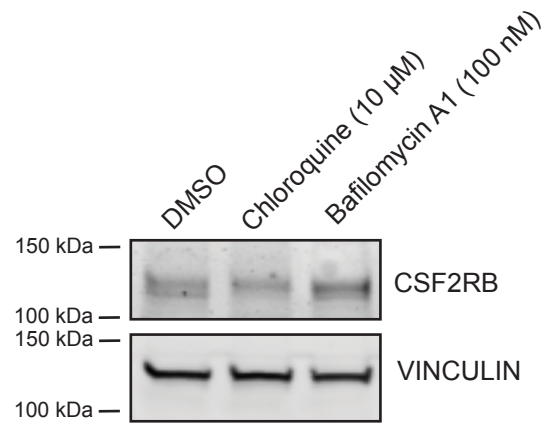**C.**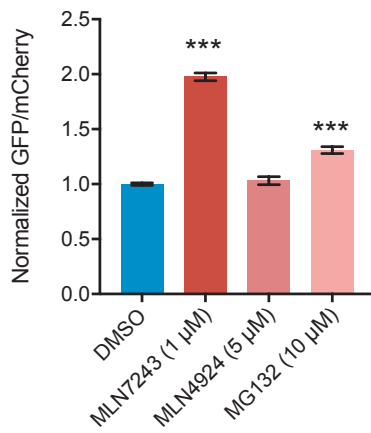**D.**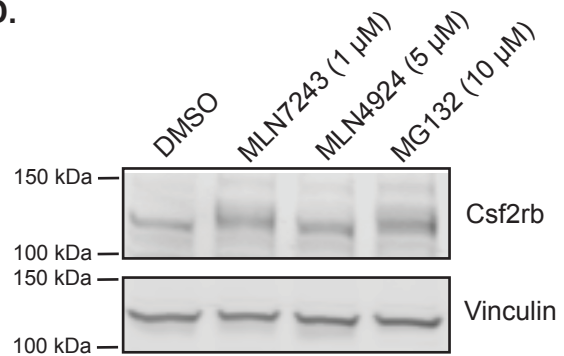**E.**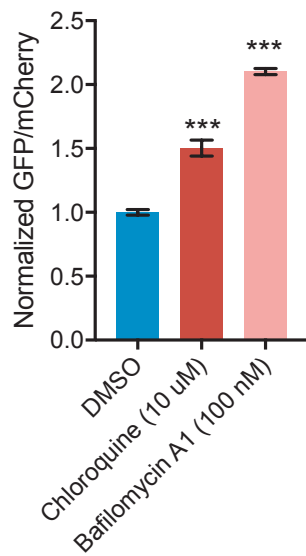**F.**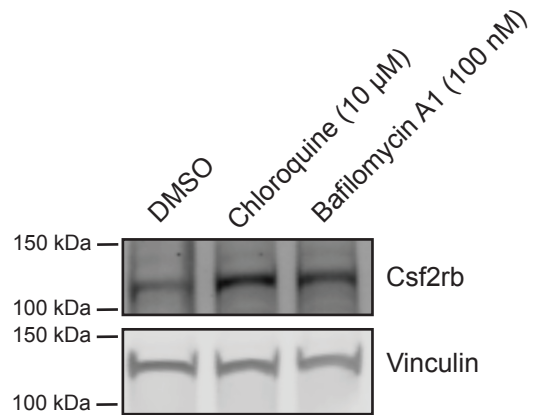

Supplement: mmc3.pdf [file mmc3.pdf]
